# Supplementary material for: Influence of polyethylene glycol on the mucus penetration and stability of lipid nanoparticles in cryopreservation and lyophilization
Source: Royal Society of Chemistry journal article supplement (doi:10.1039/d5ra05353f), 2025-01-01
Supplement: d5ra05353f1.zip [file Fig.1_Flow_cytometry_data.xlsx]

## Sheet: Flow cytometry
Flow cytometry analysis
	Positive control			Negative control			PEG 2000			PBS
Mean : FITC-A	852	718	643	113	126	119	602	437	491	202	183	188
