# Supplementary material for: Influence of polyethylene glycol on the mucus penetration and stability of lipid nanoparticles in cryopreservation and lyophilization
Source: Royal Society of Chemistry journal article supplement (doi:10.1039/d5ra05353f), 2025-01-01
Supplement: d5ra05353f1.zip [file Fig.2_Mucus_penetration_data.xlsx]

## Sheet: Mucus penetration
Mucus penetration
		PBS	PEG 400	PEG 800	PEG 1000	PEG 2000	PEG 4000	PEG 6000	PEG 10000
Fluorescence	1	38898	55751	42849	52201	65616	51252	49674	44782
	2	39644	48238	50519	51485	62566	53530	55257	46921
	3	42316	47170	48876	52762	62826	51457	56210	42205
	Thickness of mucus	2000	4000	6000	8000
Fluorescence	1	9530	5843	4477	3317
	2	9213	5789	4140	4301
	3	11404	6896	4402	3054
	Time	1h	1.5h	2h	2.5h	3h	3.5h	4h	4.5h	5h
Fluorescence	1	47783	53035	61078	72303	66359	88722	73215	81321	79972
	2	49504	57312	66735	79724	78097	84418	85316	86226	82349
	3	51871	62902	67014	62808	69091	74715	92893	86164	85055
