# Supplementary material for: Influence of polyethylene glycol on the mucus penetration and stability of lipid nanoparticles in cryopreservation and lyophilization
Source: Royal Society of Chemistry journal article supplement (doi:10.1039/d5ra05353f), 2025-01-01
Supplement: d5ra05353f1.zip [file Fig.3_and_4_LNP_Storage_stability_data.xlsx]

## Sheet: Storage
Lipid naoparticle particle size
Fresh	109.4	111.7	104
4°C	1 day			1 week			2 weeks			4 weeks
PBS	98.8	101.7	100.6	106.4	110.5	114.8	114.1	117.1	125.7	138.4	123.2	132.6
PEG 400	104.9	106.5	97.5	107.8	108.5	106.8	111.8	98.5	109.8	134.8	123	126.2
PEG 800	94.9	103.6	108.2	108.9	111.5	113.1	125.9	118.7	117	124.9	131.5	132.5
PEG 1000	101	105.7	106.7	112.6	107.5	110	118.8	122.1	119.3	131.7	130.9	132.9
PEG 2000	105.9	107	114.4	108.5	113.2	115.5	120	120.3	118.8	144.1	138.9	123.4
PEG 4000	106.5	103.8	103.1	105.8	104.1	105.9	115.9	119.9	120	130	129.4	132.7
PEG 6000	110.5	109.8	112.9	105	105.2	106.5	117.9	118.3	117.9	124.8	120.7	126
PEG 10000	109.9	111	108.7	114.4	111	110.4	123.3	126	121.3	119.3	130.3	121.6
‘-20°C	1 day			1 week			2 weeks			4 weeks
PBS	125.2	123.8	120.7	140	138.2	132	140.6	149.4	136.1	150	143.4	142.6
PEG 400	127.5	127.7	128.4	118.5	118.5	120.6	123.5	122.4	122.5	136.1	129	127.8
PEG 800	139.9	138.1	138.1	123.3	116	121.1	118.8	119.9	122.9	132	131.5	121.8
PEG 1000	139.7	137	134.7	115.3	116	115.8	137.7	137.8	145.6	140.3	137.3	141.4
PEG 2000	133.8	135.9	134.7	145.4	131	142.4	130.9	132.9	149.7	136.2	123.5	148.9
PEG 4000	137.5	137.9	130.8	141.2	143.5	129.8	134.6	131.4	127.6	137.6	136.9	135
PEG 6000	130.4	134.4	132.5	141.7	150.7	145.5	123.7	124.7	116.5	124.9	138.7	135.2
PEG 10000	129.8	127.2	129.9	143	138.2	127.4	112.6	116.4	117.7	126.4	110.8	115.3
‘-80°C	1 day			1 week			2 weeks			4 weeks
PBS	200.5	200.7	206.1	210.4	210	229.8	253.6	237.8	242.4	263.2	265.9	265.8
PEG 400	139.5	140.3	138.3	126.6	127.3	129.6	170.3	172.1	170.2	155	163.7	170.4
PEG 800	180.8	190.7	192.4	187.5	188	192.8	181.4	184.4	177.3	208.8	187.7	192
PEG 1000	184.5	179.3	175	185.8	182.1	195.3	188.6	188.3	193.2	214.7	222.9	208.7
PEG 2000	182.1	183.9	188.1	190.1	194.6	208.2	221.1	223	214.8	251.8	235.3	245
PEG 4000	180.2	225.3	210.4	218.2	229.6	213.8	215.8	230.7	231.2	259.3	247.4	257.3
PEG 6000	198.3	195.3	195.3	213.4	216.2	238.9	197.9	221.6	211.3	260.8	251	281.9
PEG 10000	208.9	163.5	161.2	183	172.4	188	186.5	186.4	196.7	206.6	209	224.1
freeze-drying	1 day			1 week			2 weeks			4 weeks
Fresh	109.4	111.7	104	109.4	111.7	104	109.4	111.7	104	109.4	111.7	104
PBS	239.3	235.2	229.7	275	269	285.5	287.7	266.1	303	291.3	268.1	282.3
PEG 400	185.5	191.5	185.7	268	261.9	253.7	268	295.1	309.7	263.3	264.6	268.1
PEG 800	198.6	211.9	200.5	266.3	267.6	280.3	272.5	300.9	292.8	259.3	282	277.6
PEG 1000	235.2	227.5	222.6	273.7	281.8	257.7	291.4	289.7	298.9	254.9	265.5	275.1
PEG 2000	211.7	197.6	200	274.4	268.8	279.6	272.9	282.4	288.9	252.6	266.3	270
PEG 4000	176	176	170.5	272.2	273	256.3	290.8	284	276.9	259	268.3	265.3
PEG 6000	170.1	170.5	172.9	253.5	262.3	255.3	279.3	295.4	289.4	266.9	274.9	285.3
PEG 10000	168.7	165.1	168.2	229.4	228.2	232.4	241.2	245.9	233.3	245.2	247.4	235.9
