# Supplementary figures and images for: Influence of polyethylene glycol on the mucus penetration and stability of lipid nanoparticles in cryopreservation and lyophilization
Source: Royal Society of Chemistry journal article supplement (doi:10.1039/d5ra05353f), 2025-01-01

Flow cytometry


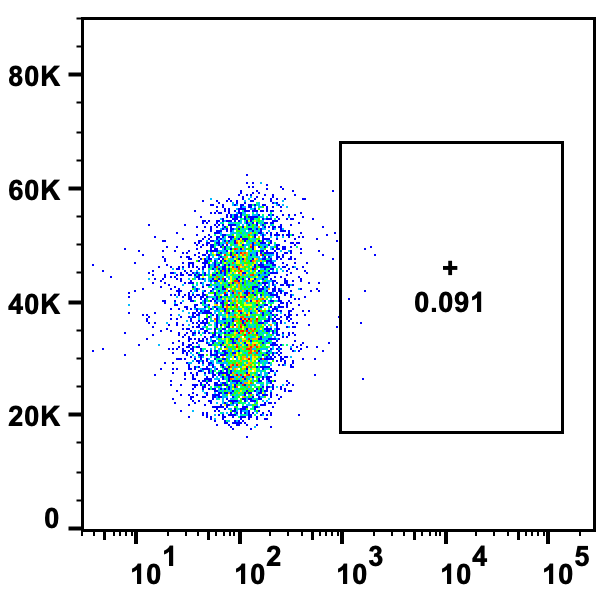

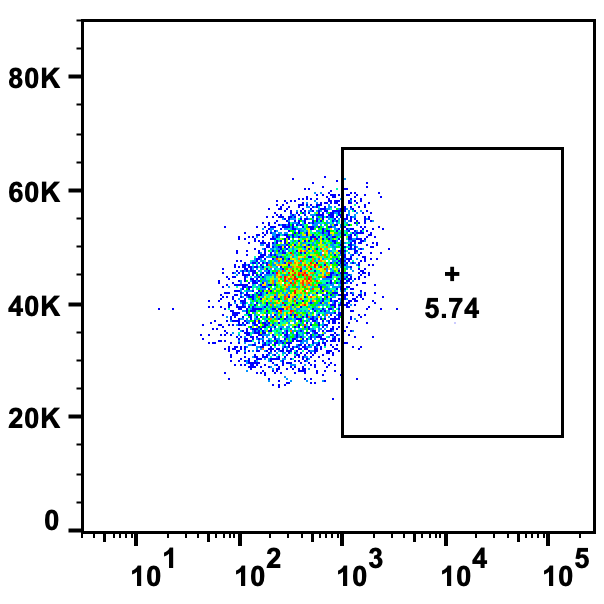

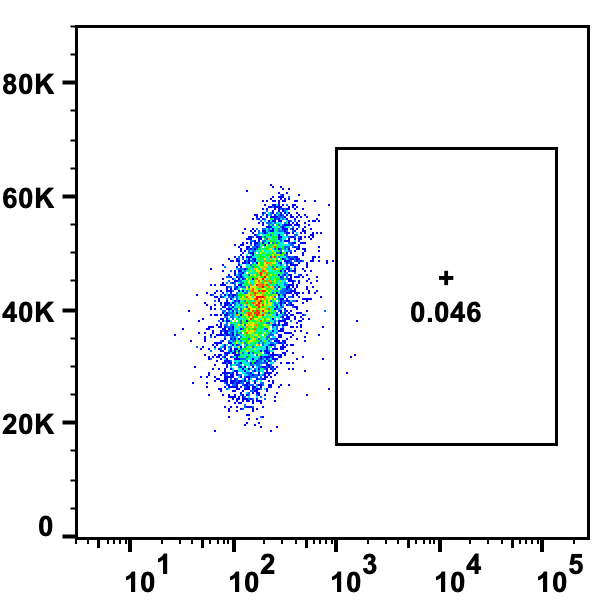

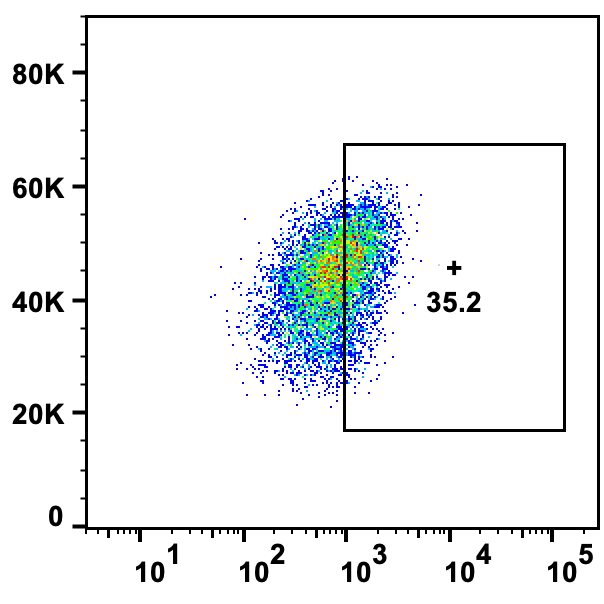


**PBS**

**PEG 2000**

**Negative control**

**Positive control**

Supplement: d5ra05353f1.zip [file Fig.2_Flow_cytometry_data.docx]
